# Supplementary figures and images for: Pulmonary cysts identified on chest CT: are they part of aging change or of clinical significance?
Source: HighWire-hosted journal article supplement (doi:10.1136/thoraxjnl-2015-207653), 2015-10-29

Supplementary Figure 1.

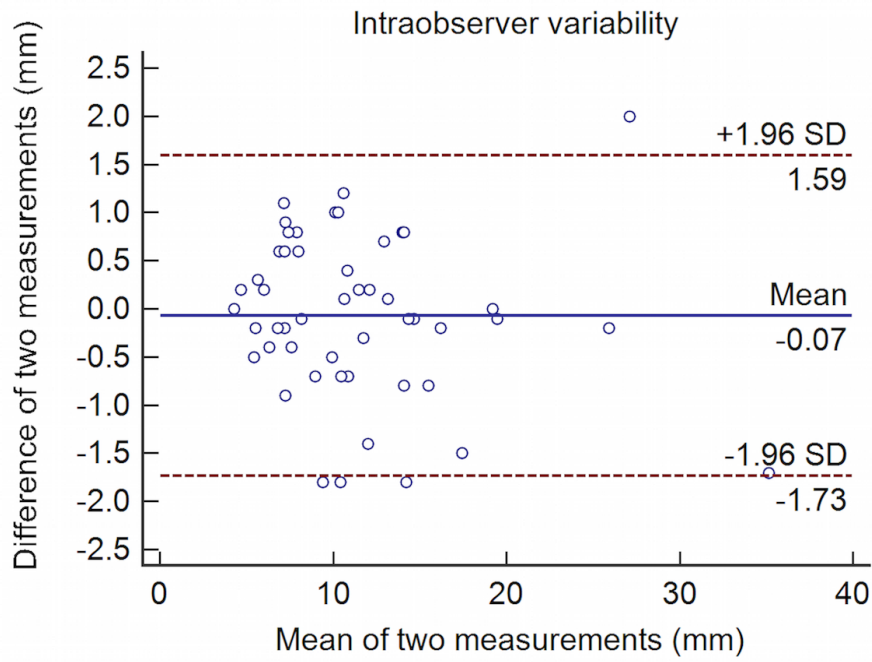

Supplementary Figure 2.

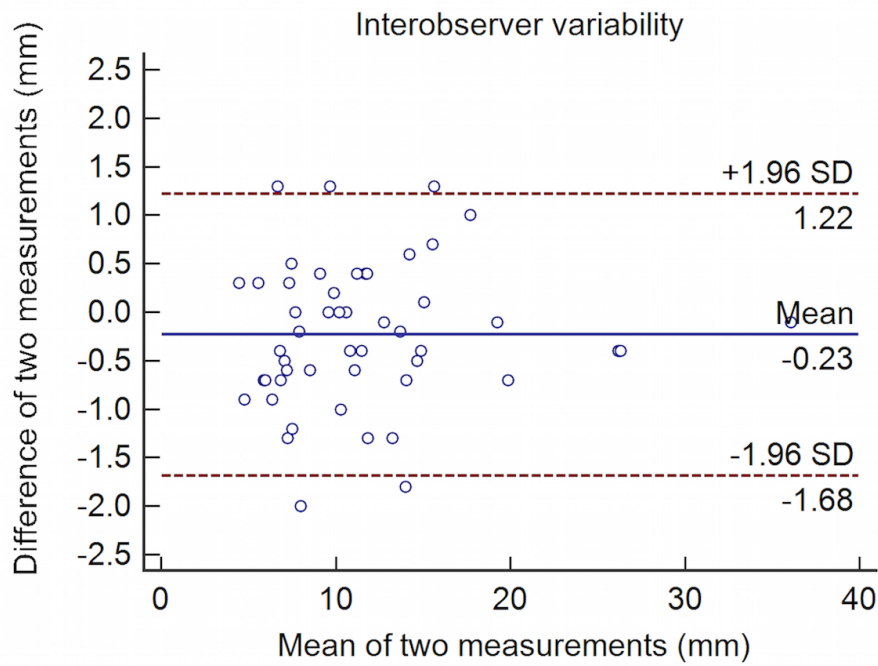

Supplement: thoraxjnl-2015-207653supp_figures.pdf [file thoraxjnl-2015-207653supp_figures.pdf]
